# Supplementary material for: Novel stable QTLs identification for berry quality traits based on high-density genetic linkage map construction in table grape
Source: PubMed Central journal article supplement (PMC7470616; doi:10.1186/s12870-020-02630-x), 2020-09-03

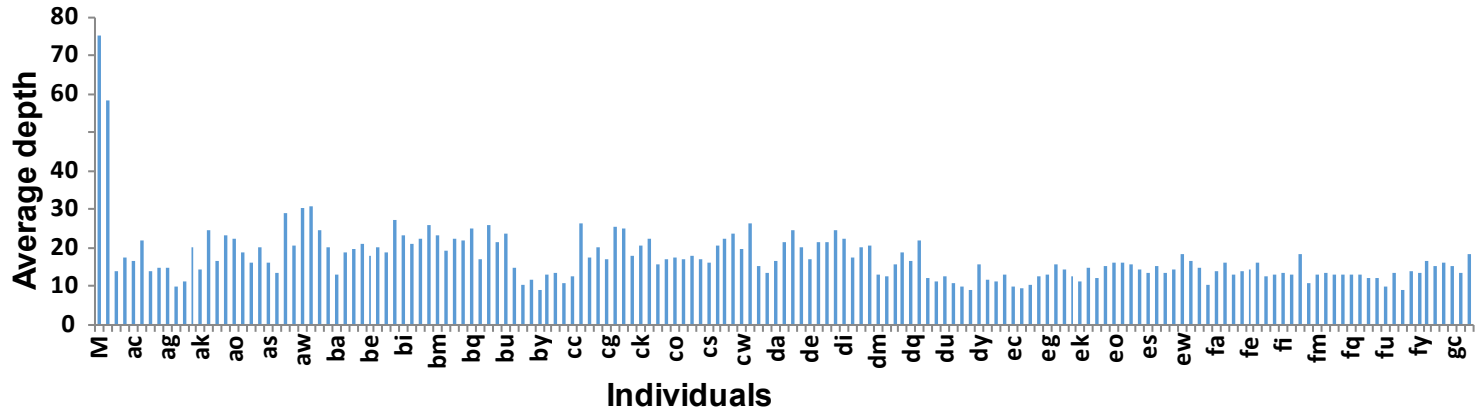

Supplement: 12870_2020_2630_MOESM6_ESM.pdf [file 12870_2020_2630_MOESM6_ESM.pdf]
