# Supplementary material for: Novel stable QTLs identification for berry quality traits based on high-density genetic linkage map construction in table grape
Source: PubMed Central journal article supplement (PMC7470616; doi:10.1186/s12870-020-02630-x), 2020-09-03
Supplement: 12870_2020_2630_MOESM7_ESM.pdf [file 12870_2020_2630_MOESM7_ESM.pdf]

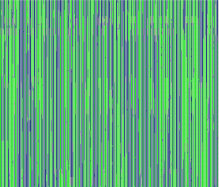

**LG1**

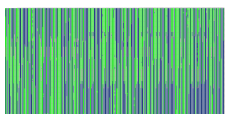

**LG2**

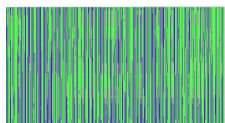

**LG3**

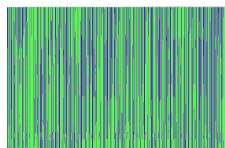

**LG4**

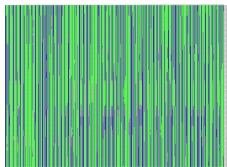

**LG5**

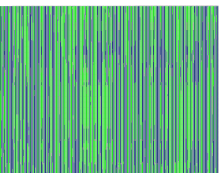

**LG6**

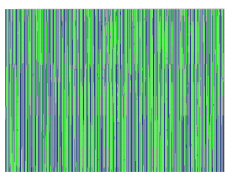

**LG7**

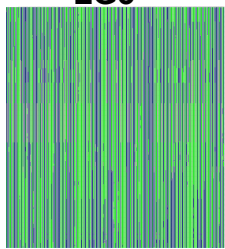

**LG8**

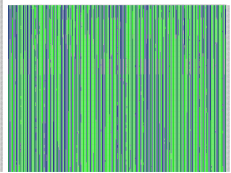

**LG9**

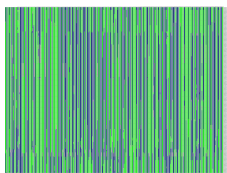

**LG10**

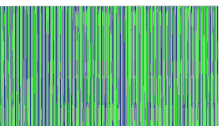

**LG11**

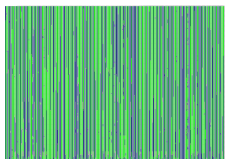

**LG12**

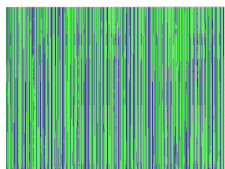

**LG13**

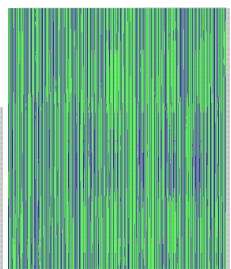

**LG14**

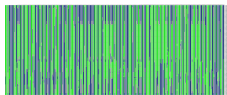

**LG15**

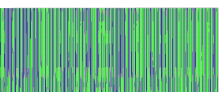

**LG16**

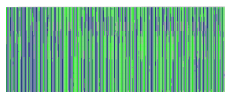

**LG17**

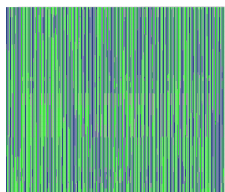

**LG18**

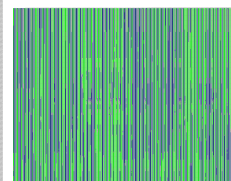

**LG19**
