# Supplementary material for: Novel stable QTLs identification for berry quality traits based on high-density genetic linkage map construction in table grape
Source: PubMed Central journal article supplement (PMC7470616; doi:10.1186/s12870-020-02630-x), 2020-09-03
Supplement: 12870_2020_2630_MOESM12_ESM.pdf [file 12870_2020_2630_MOESM12_ESM.pdf]

| <b>A</b>                 | MA    | MB    | MC    | RA    | RB    | RC    |
|--------------------------|-------|-------|-------|-------|-------|-------|
| <i>VIT_08s0007g00440</i> | 3.77  | 1.49  | 23.04 | 70.10 | 61.86 | 1.30  |
| <i>VIT_08s0040g02740</i> | 91.72 | 60.04 | 79.51 | 79.33 | 51.92 | 58.25 |
| <i>VIT_08s0040g02340</i> | 8.83  | 5.21  | 3.55  | 3.47  | 1.89  | 1.85  |
| <i>VIT_08s0040g02350</i> | 8.92  | 5.03  | 3.63  | 3.34  | 1.64  | 2.54  |
| <i>VIT_08s0007g00600</i> | 1.28  | 0.06  | 0.05  | 1.18  | 0.13  | 0.01  |
| <i>VIT_08s0007g00660</i> | 0.57  | 0.02  | 0.00  | 0.86  | 0.02  | 0.02  |
| <i>VIT_08s0007g00670</i> | 0.42  | 0.01  | 0.00  | 1.41  | 0.01  | 0.00  |
| <i>VIT_08s0007g00680</i> | 0.70  | 0.06  | 0.02  | 1.46  | 0.11  | 0.01  |
| <i>VIT_08s0007g00690</i> | 6.82  | 0.40  | 0.00  | 2.54  | 2.68  | 0.06  |
| <i>VIT_08s0007g01550</i> | 0.04  | 0.11  | 0.02  | 0.26  | 0.09  | 0.00  |
| <b>BF</b>                | 14.13 | 8.99  | 6.35  | 13.56 | 8.45  | 9.76  |

| <b>B</b>                 | MA    | MB     | MC     | RA     | RB    | RC     |
|--------------------------|-------|--------|--------|--------|-------|--------|
| <i>VIT_08s0032g01110</i> | 68.23 | 37.26  | 9.56   | 90.08  | 12.00 | 6.44   |
| <i>VIT_08s0032g00920</i> | 93.47 | 64.25  | 59.41  | 50.88  | 37.58 | 67.19  |
| <i>VIT_08s0032g01080</i> | 6.21  | 6.25   | 6.10   | 3.90   | 3.53  | 5.52   |
| <i>VIT_08s0032g01090</i> | 8.62  | 8.51   | 9.07   | 5.84   | 4.59  | 12.34  |
| <i>VIT_08s0032g01150</i> | 44.37 | 142.86 | 138.85 | 32.36  | 75.99 | 280.80 |
| <i>VIT_08s0032g01180</i> | 25.19 | 17.05  | 7.48   | 18.74  | 9.92  | 7.67   |
| <i>VIT_08s0105g00180</i> | 5.04  | 23.72  | 8.81   | 1.85   | 2.44  | 1.17   |
| <i>VIT_08s0105g00190</i> | 3.33  | 16.72  | 6.42   | 2.23   | 3.63  | 2.18   |
| <i>VIT_08s0105g00200</i> | 0.13  | 1.55   | 0.28   | 0.24   | 0.23  | 0.23   |
| <i>VIT_08s0105g00290</i> | 27.27 | 28.17  | 20.30  | 25.47  | 21.68 | 16.48  |
| <i>VIT_08s0217g00020</i> | 90.18 | 124.60 | 69.90  | 100.69 | 62.54 | 72.70  |
| <b>ShI</b>               | 1.37  | 1.12   | 1.23   | 1.19   | 1.09  | 1.05   |

| <b>C</b>                 | MA    | MB     | MC     | RA     | RB     | RC     |
|--------------------------|-------|--------|--------|--------|--------|--------|
| <i>VIT_05s0020g01240</i> | 13.06 | 8.02   | 0.74   | 6.94   | 1.19   | 0.57   |
| <i>VIT_05s0020g02130</i> | 94.62 | 107.50 | 26.15  | 133.95 | 32.12  | 15.65  |
| <i>VIT_05s0020g01840</i> | 6.31  | 7.88   | 2.22   | 17.28  | 3.19   | 2.33   |
| <i>VIT_05s0020g03860</i> | 3.11  | 57.11  | 127.60 | 1.37   | 304.66 | 288.04 |
| <i>VIT_05s0020g03640</i> | 1.37  | 1.99   | 0.01   | 6.71   | 0.35   | 0.04   |
| <i>VIT_05s0020g03170</i> | 10.67 | 10.97  | 7.48   | 58.15  | 11.73  | 1.30   |
| <b>MF</b>                | 0.00  | 0.00   | 0.00   | 0.00   | 0.00   | 4.32   |

Minimum

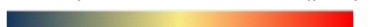

Maximum
